# Supplementary figures and images for: Hypoglycemic Effects and Mechanisms of Buckwheat–Oat–Pea Composite Flour in Diabetic Rats
Source: MDPI journal article supplement (doi:10.3390/foods11233938), 2022-12-06

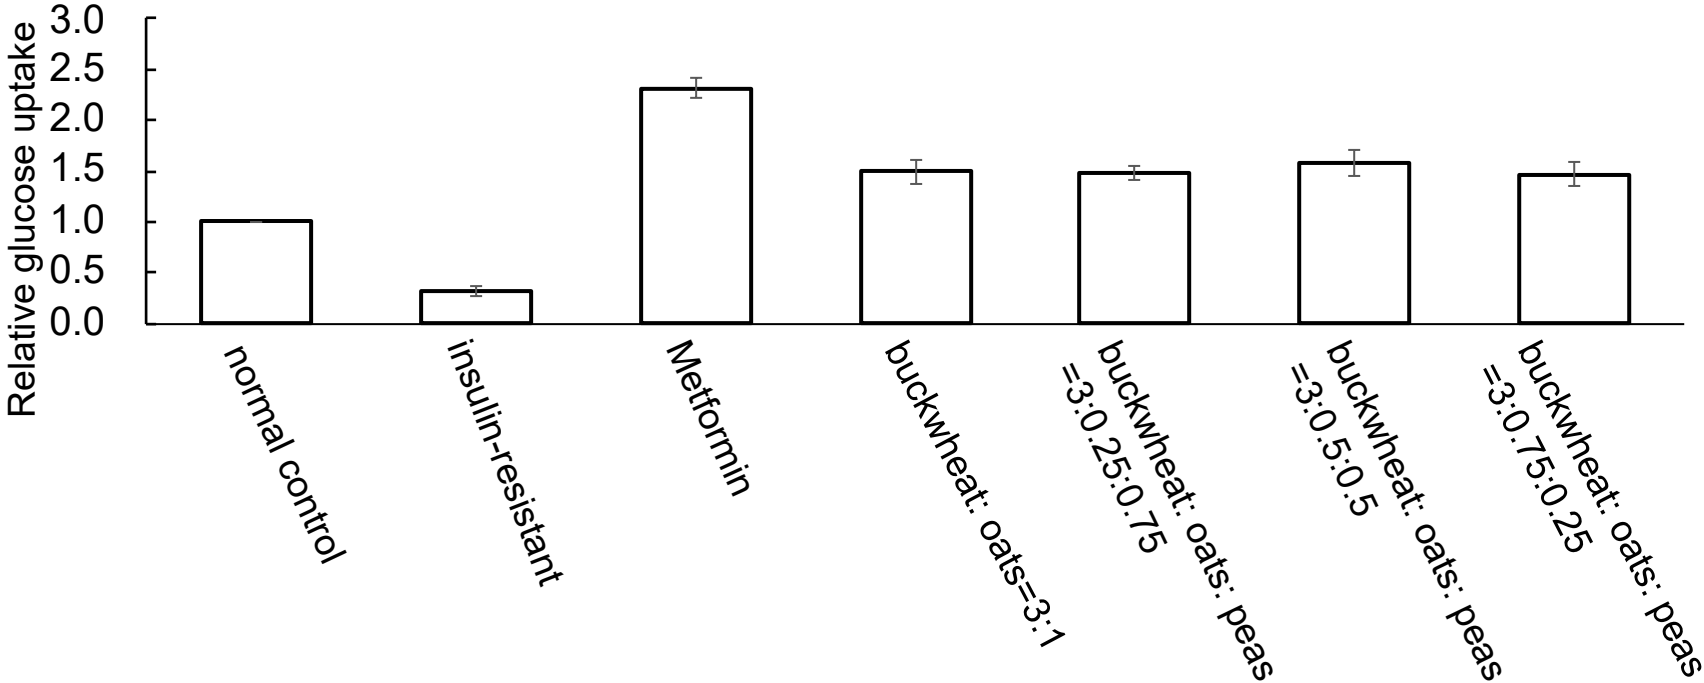

Supplement: s1 [file s1]
